# Supplementary material for: A Web-Based Knowledge Translation Resource for Families and Service Providers (The “F-Words” in Childhood Disability Knowledge Hub): Developmental and Pilot Evaluation Study
Source: JMIR Rehabil Assist Technol. 2018 Dec 21;5(2):e10439. doi: 10.2196/10439 (PMC6331144; doi:10.2196/10439)
Supplement: Multimedia Appendix 1 [file rehab_v5i2e10439_app1.pdf]

| Recommendations                                         | Steps                                           | Application in the Current Study                                                                                                                                                                                                                                                                                                                                                                                                                                     |
|---------------------------------------------------------|-------------------------------------------------|----------------------------------------------------------------------------------------------------------------------------------------------------------------------------------------------------------------------------------------------------------------------------------------------------------------------------------------------------------------------------------------------------------------------------------------------------------------------|
| 1. <b>Develop evidence-based, user-centered content</b> | 1. Assess audience needs                        | <ul style="list-style-type: none"> <li>• Informal needs assessment through ‘F-words’ awareness video survey and consultation with families and service providers</li> <li>• Scoping review conducted to explore KT strategies targeting family stakeholders</li> </ul>                                                                                                                                                                                               |
|                                                         | 2. Summarize evidence to address audience needs | <ul style="list-style-type: none"> <li>• Research team brainstormed information and sections to include in online resource</li> <li>• Key messages re: ‘F-words’ &amp; ICF concepts identified for families + service providers</li> <li>• Categorized information based on ‘need to know’ vs. ‘nice to know’</li> <li>• ‘Need to know’ (text embedded in website) vs. ‘Nice to know’ (links provided to papers and other resources for more information)</li> </ul> |
|                                                         | 3. Use theory, framework, or model              | <ul style="list-style-type: none"> <li>• KTA framework informed the development process</li> <li>• The Diffusion of Innovation theory characteristics of innovation considered when designing the resource</li> </ul>                                                                                                                                                                                                                                                |
|                                                         | 4. Select an appropriate KT format              | <ul style="list-style-type: none"> <li>• Online Knowledge Hub hosted on <i>CanChild</i> website</li> <li>• Incorporated content to meet the needs of different learning styles (e.g., included written information, videos, podcasts, downloadable fillable tools, etc.)</li> <li>• Included information created by people outside of the research team to build connections and an environment for knowledge sharing and exchange</li> </ul>                        |
|                                                         | 5. Develop learning objectives                  | <ul style="list-style-type: none"> <li>• Identified goals and learning objectives for Knowledge Hub</li> <li>• Developed a purpose statement</li> </ul>                                                                                                                                                                                                                                                                                                              |
|                                                         | 6. Include multimedia content                   | <ul style="list-style-type: none"> <li>• Videos, webinars, podcasts, presentation recordings posted on Knowledge Hub</li> </ul>                                                                                                                                                                                                                                                                                                                                      |
| 2. <b>Tailor content to online</b>                      | 1. Partner with a web                           | <ul style="list-style-type: none"> <li>• Worked with <i>CanChild’s</i> media and website specialists and students</li> </ul>                                                                                                                                                                                                                                                                                                                                         |

|                                                       |                                                                                                   |                                                                                                                                                                                                                                                                                                                                                                                                                  |
|-------------------------------------------------------|---------------------------------------------------------------------------------------------------|------------------------------------------------------------------------------------------------------------------------------------------------------------------------------------------------------------------------------------------------------------------------------------------------------------------------------------------------------------------------------------------------------------------|
| <b>format</b>                                         | developer                                                                                         |                                                                                                                                                                                                                                                                                                                                                                                                                  |
|                                                       | 2. “Mock up” content and navigational structure                                                   | <ul style="list-style-type: none"> <li>• Used PowerPoint to mock up website and then transferred content to website</li> <li>• Mapped out each section including navigational structure</li> </ul>                                                                                                                                                                                                               |
|                                                       | 3. Consider web sustainability                                                                    | <ul style="list-style-type: none"> <li>• Goal for website to be a ‘living’ document that can be continually updated</li> <li>• Designated internal <i>CanChild</i> staff member and KT students assist with keeping the website up to date</li> </ul>                                                                                                                                                            |
|                                                       | 4. Pilot test with intended audience                                                              | <ul style="list-style-type: none"> <li>• Informal pilot test with families, service providers, students and researchers affiliated with <i>CanChild</i> to pilot website</li> </ul>                                                                                                                                                                                                                              |
| <b>3. Evaluate impact</b>                             | 1. Embed evaluation within resource                                                               | <ul style="list-style-type: none"> <li>• Pilot evaluation (anonymous survey) to evaluate utility (reach, usefulness, and use) of the Knowledge Hub</li> </ul>                                                                                                                                                                                                                                                    |
|                                                       | 2. Collect usage data                                                                             | <ul style="list-style-type: none"> <li>• Google analytics used to track number of visits to Knowledge Hub</li> <li>• Further analysis can be run (e.g., number of times people access, avg. time spent per visit, popular resources vs. those overlooked, etc.)</li> </ul>                                                                                                                                       |
|                                                       | 3. Build in methods to evaluate short-term and long-term learning, retention, and behavior change | <ul style="list-style-type: none"> <li>• Will be incorporated into follow-up studies to evaluate impact of Knowledge Hub at the family, clinician, and organizational levels</li> <li>• Mixed-methods evaluation including quantitative questionnaires exploring participants’ self-reported change in knowledge, attitudes, behaviour and qualitative interviews to gain more in-depth understanding</li> </ul> |
| <b>4. Share results and disseminate the knowledge</b> | 1. Write scientific papers to report your results                                                 | <ul style="list-style-type: none"> <li>• This article reports on the development process and preliminary findings from the pilot evaluation of the Knowledge Hub.</li> </ul>                                                                                                                                                                                                                                     |

|  |                                                                                       |                                                                                                                                                                                                                                                                                                                              |
|--|---------------------------------------------------------------------------------------|------------------------------------------------------------------------------------------------------------------------------------------------------------------------------------------------------------------------------------------------------------------------------------------------------------------------------|
|  | 2. Share results with participants to disseminate information to your target audience | <ul style="list-style-type: none"> <li>• An ‘In Brief’ (lay summary) will be written on findings from the pilot evaluation and posted on the Knowledge Hub</li> <li>• Will also share findings through presentations and webinars</li> <li>• Social media and <i>CanChild</i> Today newsletter will share updates</li> </ul> |
|  | 3. Maintain knowledge “currency”                                                      | <ul style="list-style-type: none"> <li>• KT specialists at <i>CanChild</i> will be responsible for keeping Knowledge Hub up to date</li> </ul>                                                                                                                                                                               |
