# Supplementary material for: A Web-Based Knowledge Translation Resource for Families and Service Providers (The “F-Words” in Childhood Disability Knowledge Hub): Developmental and Pilot Evaluation Study
Source: JMIR Rehabil Assist Technol. 2018 Dec 21;5(2):e10439. doi: 10.2196/10439 (PMC6331144; doi:10.2196/10439)
Supplement: Multimedia Appendix 2 [file rehab_v5i2e10439_app2.pdf]

| Section                   | Description                                                                                                                                                                                                                                                                                                                                                                                                                                                                                                                                                                                                                                                                         |
|---------------------------|-------------------------------------------------------------------------------------------------------------------------------------------------------------------------------------------------------------------------------------------------------------------------------------------------------------------------------------------------------------------------------------------------------------------------------------------------------------------------------------------------------------------------------------------------------------------------------------------------------------------------------------------------------------------------------------|
| F-words Homepage          | <ul style="list-style-type: none"> <li>• General introduction to the Knowledge Hub.</li> <li>• Introduction video welcomes people to the hub and provides an overview of the various sections, tools, and resources.</li> <li>• Includes written text that identifies and defines the six ‘F-words’, provides a brief summary of the ICF framework, and shows both the ICF and ‘F-words’ frameworks.</li> <li>• Two ‘F-words’ awareness videos, created by parents and youth with disabilities featured to capture visitors’ attention and engage the audience.</li> <li>• Embedded link to the open access ‘F-words’ publication provided.</li> </ul>                              |
| ICF Resources             | <ul style="list-style-type: none"> <li>• Written text provides key messages regarding the ICF framework.</li> <li>• Sub-headings include: 1) What is the ICF Framework? 2) Why is it important? and 3) What does it mean for families and service providers?</li> <li>• Links to additional ICF resources for people who are interested in learning more provided.</li> </ul>                                                                                                                                                                                                                                                                                                       |
| F-words Footprint         | <ul style="list-style-type: none"> <li>• Highlights how the ‘F-words’ are being shared and used around the world. People are invited to contribute to this section – foster knowledge sharing and exchange.</li> <li>• Includes a list of the publications, an interactive map highlighting the presentations given around the world, videos on the ‘F-words’, podcasts, webinars, downloadable PDFs of posters presented on the ‘F-words’, and links to online blogs and news articles that have featured the ‘F-words’ ideas.</li> <li>• Features the ‘F-words’ poster, created in collaboration with World CP Day in 2016, and now translated into &lt; 25 languages.</li> </ul> |
| Family & Clinician Voices | <ul style="list-style-type: none"> <li>• Features how parents, youth with disabilities and clinicians are talking about and applying the ‘F-words’ (bring the ‘F-words’ to life).</li> <li>• The quotes are taken from news articles and online blogs written by people around the world and the pictures have been shared by families and service providers.</li> </ul>                                                                                                                                                                                                                                                                                                            |
| F-words Tools             | <ul style="list-style-type: none"> <li>• Section 1: Interactive, downloadable tools created by our research team, including the ‘F-words Agreement’, ‘F-words Photo Collage’, ‘F-words Goal Sheet’, and</li> </ul>                                                                                                                                                                                                                                                                                                                                                                                                                                                                  |

|                       |                                                                                                                                                                                                             |
|-----------------------|-------------------------------------------------------------------------------------------------------------------------------------------------------------------------------------------------------------|
|                       | <p>‘F-words Profile’.</p> <ul style="list-style-type: none"> <li>Section 2: Real-life examples of how clinicians and organizations have applied the ‘F-words’ in their individual work settings.</li> </ul> |
| F-words Research Team | <ul style="list-style-type: none"> <li>Introduces each member of our integrated research team (picture and bio provided).</li> </ul>                                                                        |
